# Supplementary material for: Global Expression Profiling of Low Temperature Induced Genes in the Chilling Tolerant Japonica Rice Jumli Marshi
Source: PLoS One. 2013 Dec 12;8(12):e81729. doi: 10.1371/journal.pone.0081729 (PMC3861252; doi:10.1371/journal.pone.0081729)
Supplement: Table S7 — JMO, CCI and CIT genes associated with cold QTLs. (XLSX) [file pone.0081729.s010.xlsx]

## Sheet: TableS7
JMO genes found in cold QTLs	CIT genes in cold QTLs	CCI genes in cold QTLs
Os11g0227000	Os12g0613500	Os01g0833400
Os06g0343600	Os05g0281400	Os02g0134200
Os05g0558000	Os07g0518500	Os01g0742400
Os08g0483600	Os09g0287500	Os01g0175100
Os02g0159800	Os01g0723800	Os01g0862800
Os06g0687800	Os05g0133900	Os08g0386800
Os11g0217500	Os10g0532800	Os03g0258200
Os02g0614600	Os01g0856500	Os10g0392400
Os07g0647100	Os01g0904200	Os02g0724000
Os09g0501600	Os01g0840200	Os01g0900800
Os01g0937200	Os01g0606400	Os03g0203700
Os01g0870100	Os12g0106000	Os03g0181100
Os08g0245400	Os07g0229100
Os12g0609500	Os08g0519700
Os03g0823000	Os09g0446800
Os01g0348600	Os01g0956200
Os11g0708500	Os05g0420500
Os01g0923200	Os01g0888500
Os06g0217600	Os03g0387900
Os05g0575500	Os10g0436800
Os10g0555600	Os09g0551300
Os05g0555600	Os10g0560400
Os01g0810100	Os03g0131900
Os03g0113500	Os09g0284300
Os02g0313400	Os02g0145000
Os01g0974500	Os10g0376200
Os05g0563000	Os07g0674400
Os05g0386700	Os04g0521800
Os03g0108300	Os11g0496500
Os10g0539400	Os12g0270100
Os09g0423700	Os09g0560500
Os02g0234800	Os11g0282300
Os10g0103700	Os04g0674050
Os02g0160600	Os06g0326500
Os02g0723200	Os03g0799600
Os01g0837800	Os06g0131300
Os05g0204900	Os11g0572500
Os08g0507400	Os02g0678200
Os03g0598200	Os12g0290200
Os02g0814200	Os08g0137400
Os06g0671700
Os11g0585700
Os06g0639500
Os06g0281400
Os07g0644600
Os04g0402700
Os01g0686000
Os01g0131800
Os08g0184600
Os11g0155100
Os04g0678300
Os10g0395200
Os08g0162400
Os02g0230200
Os05g0354300
Os03g0364400
Os03g0833700
Os03g0594400
Os05g0106200
Os01g0976200
Os01g0321700
Os01g0886300
Os11g0468200
Os01g0229900
Os04g0644800
Os09g0559800
Os07g0640200
Os09g0443500
Os02g0195600
Os03g0294600
Os03g0841700
Os08g0269600
Os03g0586800
Os02g0498300
Os04g0462900
Os02g0722700
Os06g0549300
Os07g0692900
Os01g0695100
Os07g0689300
Os09g0103200
Os01g0287600
Os05g0579100
Os01g0798200
Os07g0176400
Os05g0148000
Os12g0507200
Os04g0534000
Os02g0141500
Os02g0752800
Os02g0150700
Os12g0615800
Os01g0857500
Os11g0265900
Os01g0356500
Os03g0827500
Os01g0231500
Os07g0615800
Os03g0758600
Os12g0159400
Os04g0476800
Os01g0268900
Os08g0326100
Os03g0266800
Os05g0581000
Os09g0433000
Os03g0370900
Os08g0451101
Os02g0742200
Os05g0292700
Os01g0689900
Os02g0540400
Os12g0541200
Os03g0221300
Os09g0487100
Os04g0483400
Os09g0554300
Os06g0690600
Os10g0414500
Os02g0445600
Os03g0284900
Os06g0608401
Os10g0136200
Os07g0455100
Os05g0307000
Os11g0462100
Os07g0175900
Os05g0256500
Os06g0705700
Os09g0242800
Os02g0825650
Os04g0528300
Os03g0751800
Os05g0279900
Os06g0585200
Os01g0686100
Os01g0540800
Os07g0439000
Os03g0601100
Os07g0273900
Os02g0755200
Os07g0167100
Os06g0651600
Os04g0178400
Os02g0775900
Os04g0650600
Os10g0446600
Os01g0153100
Os04g0612800
Os06g0119900
Os10g0489200
Os04g0601800
Os11g0633500
Os03g0787300
Os03g0777600
Os04g0553800
Os11g0228600
Os01g0646500
Os03g0721900
Os06g0558700
Os11g0148800
Os04g0502900
Os07g0144500
Os08g0446200
Os04g0508900
Os04g0576500
Os03g0769400
Os06g0574400
Os03g0715500
Os06g0625900
Os02g0557700
Os05g0359700
Os09g0474000
Os04g0525900
Os04g0441800
Os05g0151400
Os04g0607200
Os06g0235200
Os05g0452800
Os05g0232700
Os03g0139000
Os01g0584300
Os07g0227400
Os05g0396900
Os05g0188300
Os01g0848900
Os03g0157800
Os04g0382200
Os01g0665900
Os08g0428900
Os10g0492200
Os04g0663100
Os02g0770300
Os11g0457300
Os04g0403901
Os06g0653200
Os01g0784700
Os12g0581300
Os07g0548800
Os08g0321500
Os07g0655500
Os07g0265100
Os03g0301400
Os12g0174800
Os06g0503100
Os08g0260600
Os09g0266400
Os08g0482100
Os09g0123100
Os01g0611900
Os03g0847600
Os12g0609800
Os09g0516600
Os03g0336000
Os10g0446800
Os08g0505900
Os09g0364000
Os03g0749500
Os02g0231600
Os04g0692300
Os06g0118600
Os03g0227800
Os02g0710800
Os07g0179300
Os02g0656100
Os05g0541000
Os02g0178100
Os11g0433800
Os08g0524800
Os01g0681200
Os04g0108100
Os01g0675700
